# Supplementary material for: Machine-learning-aided multiplexed nanoplasmonic biosensor for COVID-19 population immunity profiling
Source: Royal Society of Chemistry journal article supplement (doi:10.1039/d3sd00081h), 2023-01-01
Supplement: d3sd00081h1.xlsx [file d3sd00081h1.xlsx]

## Sheet: Fig.3(a)Naive
Patients	M_WT	M_Om	RBD_WT	RBD_Om	N_WT	S_WT	Type
1	-17.4372	-17.3303	-18.1691	-20.6999	-9.38363	-26.0029	Naive
2	-13.057	-14.9423	-13.9784	-23.5206	9.74695	-18.2942	Naive
3	-3.01269	-6.38747	-1.14896	-17.3438	-13.0498	-18.3567	Naive
4	-10.6528	-14.6321	-11.5325	-19.309	-4.42213	-19.8677	Naive
5	-7.57525	-2.22345	-9.74871	-12.9445	15.7574	-4.03588	Naive
6	-10.5857	-13.7329	-11.7527	-15.8502	17.2296	-17.8381	Naive
7	-17.4878	-16.8657	-12.7365	-15.2663	10.9817	-18.1177	Naive
8	-11.7885	-16.3557	-11.9696	-17.8231	17.7903	-12.6323	Naive
9	-15.061	-15.8996	-13.7472	-17.957	23.622	-18.3127	Naive
10	-6.66745	-8.85551	-5.06863	-9.72868	10.6685	-11.4232	Naive
11	-9.0682	-7.35737	-5.32142	-9.10135	0.724627	-10.6505	Naive
12	-14.4857	-11.6217	-2.0913	-2.54825	-10.2043	-15.1025	Naive
13	-13.8545	-11.0571	-5.54397	-8.33554	-12.1113	-18.4129	Naive
14	-2.7348	-1.47697	-3.00746	-9.17325	18.0981	-11.497	Naive
15	-27.5832	-22.5529	-16.2384	-23.1611	-20.0227	-25.5124	Naive
16	-22.2483	-22.3613	-19.3107	-22.4956	13.9132	-20.3832	Naive
17	-5.74384	-6.5634	-6.02544	-11.6222	-14.3815	-14.2747	Naive
18	-5.23556	-4.14706	9.54382	-12.3241	17.7362	-13.7481	Naive

## Sheet: Fig.3(b)V
Patients	M_WT	M_Om	RBD_WT	RBD_Om	N_WT	S_WT	Type
1	-16.5176	-18.1532	3.20504	-14.3798	-14.7611	27.4212	Vaccinated
2	-11.8014	-12.875	22.0212	16.8898	-7.42492	24.84	Vaccinated
3	-11.3962	-14.8692	7.62418	-4.39632	-6.73315	25.2213	Vaccinated
4	-12.1065	-15.1554	23.9078	14.7699	24.0427	32.714	Vaccinated
5	-13.41	-14.8224	8.46329	-5.72978	-6.10875	24.8548	Vaccinated
6	-16.3421	-15.2526	22.4023	3.34107	-9.56222	28.7773	Vaccinated
7	-13.355	-13.1186	9.4759	-2.8376	7.5866	8.33446	Vaccinated
8	-12.712	-14.3801	37.103	23.7915	-6.7915	49.0162	Vaccinated
9	-11.4793	-11.5598	17.467	3.58247	17.9004	28.561	Vaccinated
10	-10.6651	-9.66379	25.6449	10.6457	12.1549	39.3221	Vaccinated
11	-14.1685	-12.2918	-10.7762	-17.1095	3.19766	7.85579	Vaccinated
12	-4.06684	-3.41331	10.6759	-6.08663	8.89019	23.3012	Vaccinated
13	-14.4588	-14.9514	7.77899	-15.4017	-5.62622	29.0925	Vaccinated
14	-16.0212	-16.5682	36.2915	24.9619	0.768321	43.2507	Vaccinated
15	-14.4857	-14.9476	19.2755	10.8794	11.9357	31.7193	Vaccinated
16	-2.92507	-1.72822	12.1549	-2.27196	-11.9237	18.974	Vaccinated
17	-4.37844	-8.34583	15.9881	4.76608	12.957	31.2039	Vaccinated
18	-11.0082	-7.50564	-6.37165	-13.3054	2.3463	0.555266	Vaccinated

## Sheet: Fig.3(c)C
Patients	M_WT	M_Om	RBD_WT	RBD_Om	N_WT	S_WT	Type
1	22.3539	20.0473	21.6706	-13.9216	33.2361	29.1034	Convalescent
2	19.6193	16.9925	5.81151	-20.3374	41.9913	18.7023	Convalescent
3	17.5434	13.4639	11.0189	-17.3135	19.1955	16.9681	Convalescent
4	20.285	20.9341	21.9412	-16.3038	20.3095	24.2146	Convalescent
5	14.8418	14.0794	13.9126	-12.9554	21.027	23.9585	Convalescent
6	20.361	18.663	20.0907	-3.70816	25.1195	20.4945	Convalescent
7	3.29529	-3.60681	15.2704	-6.79631	17.9007	17.7879	Convalescent
8	19.6715	17.8819	23.2637	0.566095	20.92	21.3187	Convalescent
9	26.1801	22.6359	11.5729	-18.5424	31.561	25.5907	Convalescent
10	22.8125	20.9491	23.1781	11.0507	19.0786	34.9899	Convalescent
11	3.77089	-6.92721	12.4184	-14.3691	20.2425	20.9363	Convalescent
12	19.0215	19.8541	22.411	16.3761	27.8609	26.5104	Convalescent
13	12.4767	11.4532	10.8075	4.13019	12.7311	12.8739	Convalescent
14	0.0987369	0.601637	14.2205	1.68574	20.4489	18.6285	Convalescent
15	18.6428	18.0302	19.3592	12.7934	29.465	27.1675	Convalescent
16	19.5079	16.7946	25.6662	14.0732	32.1609	29.4686	Convalescent
17	3.81992	-1.13547	11.4995	-16.6305	25.685	27.7331	Convalescent
18	-0.420653	-3.74613	21.2609	15.9894	33.7281	27.9604	Convalescent

## Sheet: Fig.3(d)CV
Patients	M_WT	M_Om	RBD_WT	RBD_Om	N_WT	S_WT	Type
1	6.76157	8.97618	36.7074	28.1287	8.66014	41.6681	Convalescent Vaccinated
2	-5.01062	-4.52257	23.5414	13.225	14.8542	26.3057	Convalescent Vaccinated
3	-1.99111	-5.58515	18.21	-1.88272	10.6942	26.9595	Convalescent Vaccinated
4	0.422561	2.29284	43.2324	32.6362	2.82802	49.8735	Convalescent Vaccinated
5	4.08415	4.89349	35.5768	25.0761	22.2064	40.9943	Convalescent Vaccinated
6	-1.54657	6.91843	21.3705	13.6303	5.81749	28.5024	Convalescent Vaccinated
7	11.3216	8.65297	47.4881	34.1195	23.0741	49.7988	Convalescent Vaccinated
8	-0.91355	1.38308	20.3435	4.21658	0.141418	25.8084	Convalescent Vaccinated
9	7.70423	4.41448	23.8037	17.0469	-11.6546	31.2287	Convalescent Vaccinated
10	5.84171	-13.5437	34.4521	28.4821	-0.180946	43.8302	Convalescent Vaccinated
11	24.3604	28.1171	47.2728	32.0062	16.5178	53.6516	Convalescent Vaccinated
12	-7.21686	-13.1457	46.1601	34.3439	23.1837	53.3836	Convalescent Vaccinated
13	10.9154	5.11543	21.075	6.57519	8.04199	25.8493	Convalescent Vaccinated
14	9.64285	6.88533	33.5978	25.0541	25.896	35.9645	Convalescent Vaccinated
15	2.08325	-10.4724	17.2632	9.15467	9.57241	24.459	Convalescent Vaccinated
16	9.29682	9.451	20.4984	12.5931	-5.8544	15.2257	Convalescent Vaccinated
17	2.49201	6.21069	31.4458	21.4942	16.7122	39.8491	Convalescent Vaccinated
18	-0.390072	-2.53666	23.5893	16.4485	4.79599	28.5647	Convalescent Vaccinated

## Sheet: Fig.4(b,d)BlindSamples
Patients	M_WT	M_Om	RBD_WT	RBD_Om	N_WT	S_WT	Type	Prediction
1	-1.20016	-12.9153	-12.0254	-18.7467	-14.5164	-14.5008	Unknown Patients	Naive
2	-15.8362	-10.4016	1.47658	-14.3589	2.62593	-5.20504	Unknown Patients	Naive
3	-8.20171	-8.62124	4.99361	-13.9063	4.96761	-12.5176	Unknown Patients	Naive
4	-4.0949	-2.18225	-2.459	-6.90596	19.6391	-6.54063	Unknown Patients	Naive
5	-6.9966	-10.4732	19.8018	16.0302	5.20409	26.002	Unknown Patients	Vaccinated
6	-6.8356	-14.3294	30.6661	22.9274	0.0176243	33.4358	Unknown Patients	Vaccinated
7	-7.93745	-16.6653	34.4258	21.103	-2.09574	33.2708	Unknown Patients	Vaccinated
8	-14.4356	-1.83486	22.3246	-1.24214	20.5132	26.3402	Unknown Patients	Vaccinated
9	-7.83441	-13.8755	7.46774	-20.1498	-12.9592	9.97608	Unknown Patients	Vaccinated
10	-19.2873	-19.4219	22.6751	16.6225	-22.6463	17.6103	Unknown Patients	Vaccinated
11	-13.1383	-16.409	20.1697	4.60534	-0.41374	27.8498	Unknown Patients	Vaccinated
12	-7.26729	-10.8196	21.3998	10.2844	1.45648	22.7252	Unknown Patients	Vaccinated
13	-19.1486	-17.8314	7.6264	-19.9718	-27.2927	7.45891	Unknown Patients	Vaccinated
14	-12.0516	-13.2761	31.3517	24.0092	-19.3685	36.9633	Unknown Patients	Vaccinated
15	-25.8013	-21.6347	12.0493	-12.0852	-33.1327	26.2462	Unknown Patients	Vaccinated
16	-11.0066	-17.3515	46.9567	35.1022	2.52848	42.2322	Unknown Patients	Vaccinated
17	-16.4517	-16.7316	54.1719	42.3002	-5.33093	43.1652	Unknown Patients	Vaccinated
18	-7.46382	-8.61633	31.9411	26.3804	-9.94225	28.9761	Unknown Patients	Vaccinated
19	-15.2484	-17.0999	16.3554	6.66714	-2.18247	16.6392	Unknown Patients	Vaccinated
20	-4.31788	-7.1656	33.1378	29.2162	-8.53506	38.4295	Unknown Patients	Vaccinated
21	-4.48312	-9.5273	30.9654	26.5819	13.5351	29.7457	Unknown Patients	Vaccinated
22	-8.522	-14.1513	29.1653	22.5572	-10.8035	38.9522	Unknown Patients	Vaccinated
23	-3.6941	-4.3841	19.6933	15.2014	-2.25098	21.5359	Unknown Patients	Vaccinated
24	-8.62718	-6.30505	33.9403	27.8519	-11.89	38.3206	Unknown Patients	Vaccinated
25	-8.40605	-9.81759	20.1671	15.4933	16.1369	23.9879	Unknown Patients	Vaccinated
26	-6.95743	-15.2342	26.7553	19.3762	13.1683	27.0687	Unknown Patients	Vaccinated
27	-3.96418	-10.6929	27.0417	16.3804	-11.0566	24.95	Unknown Patients	Vaccinated
28	-8.03585	-11.8645	24.3863	18.6058	15.777	26.3563	Unknown Patients	Vaccinated
29	-5.06613	-13.7814	27.1471	19.104	3.45891	32.7924	Unknown Patients	Vaccinated
30	-14.2074	-15.9504	40.9301	35.8334	17.4829	46.673	Unknown Patients	Vaccinated
31	-13.5012	-14.3054	6.89415	-11.5628	10.7294	13.1682	Unknown Patients	Vaccinated
32	-6.22987	-14.0599	33.3976	26.0031	14.9979	40.4068	Unknown Patients	Vaccinated
33	-9.54832	-14.3334	31.9306	24.5671	19.8826	36.568	Unknown Patients	Vaccinated
34	-11.8464	-14.7663	26.1742	20.1636	-7.35532	28.0071	Unknown Patients	Vaccinated
35	-12.7068	-14.6281	24.2343	15.6391	-13.7743	27.8976	Unknown Patients	Vaccinated
36	-15.1576	-20.5588	38.7938	31.8433	-2.32282	54.0013	Unknown Patients	Vaccinated
37	-12.2073	-18.538	33.1569	23.648	7.63226	39.3255	Unknown Patients	Vaccinated
38	-15.0536	-18.8059	23.8145	11.9561	-19.8277	26.8538	Unknown Patients	Vaccinated
39	-14.8618	-13.6064	29.9622	19.3723	16.0549	30.3333	Unknown Patients	Vaccinated
40	-14.9556	-17.0204	19.3699	12.2744	9.97156	25.873	Unknown Patients	Vaccinated
41	-14.9103	-15.7729	27.438	18.8914	14.0559	36.4083	Unknown Patients	Vaccinated
42	-9.59416	-20.4756	21.7082	16.6024	-19.5246	24.4687	Unknown Patients	Vaccinated
43	-13.8416	-14.634	27.1541	16.5247	2.76843	27.8699	Unknown Patients	Vaccinated
44	-9.04045	-15.2335	20.5078	15.3653	-19.7904	15.5738	Unknown Patients	Vaccinated
45	-11.8004	-14.8249	21.6206	13.1106	-11.8988	18.7145	Unknown Patients	Vaccinated
46	6.50867	0.119478	17.5208	12.5423	19.146	21.484	Unknown Patients	Convalescent
47	6.53408	8.91889	14.0217	-5.20948	9.61352	18.2287	Unknown Patients	Convalescent
48	11.3475	9.57548	12.7246	-0.740923	-17.0835	11.012	Unknown Patients	Convalescent
49	16.3984	12.4955	22.1565	12.0408	20.2192	36.0834	Unknown Patients	Convalescent
50	13.943	12.8324	17.5613	14.3475	15.0339	16.3836	Unknown Patients	Convalescent
51	15.8147	11.742	15.5105	4.68455	15.5525	2.60141	Unknown Patients	Convalescent
52	1.11991	3.40441	23.1607	14.8088	22.3028	29.8677	Unknown Patients	Convalescent
53	13.4018	12.6472	18.7687	12.4449	16.7245	21.5363	Unknown Patients	Convalescent
54	12.2497	11.4434	17.9072	8.98464	17.3227	22.7354	Unknown Patients	Convalescent
55	8.48217	11.8063	21.2322	22.1745	14.1125	25.6386	Unknown Patients	Convalescent Vaccinated
56	7.60959	-0.372014	30.657	24.6902	25.6202	31.1326	Unknown Patients	Convalescent Vaccinated
57	6.42064	-3.17308	26.3841	23.2403	32.6477	33.2155	Unknown Patients	Convalescent Vaccinated
58	9.69542	-8.49019	33.7433	25.675	7.40103	34.5413	Unknown Patients	Convalescent Vaccinated
59	-1.56038	-9.22745	22.0313	10.0161	5.63587	27.0289	Unknown Patients	Convalescent Vaccinated
60	-0.738862	-5.9098	27.0446	25.1475	-4.51869	29.7434	Unknown Patients	Convalescent Vaccinated
61	3.12829	-4.74074	37.7826	25.7156	10.5909	39.6755	Unknown Patients	Convalescent Vaccinated
62	13.2407	8.47031	33.8336	26.7925	18.1256	33.0009	Unknown Patients	Convalescent Vaccinated
63	12.2158	13.13	44.1867	43.4214	16.8991	47.8293	Unknown Patients	Convalescent Vaccinated
64	9.21682	-2.9451	38.1108	29.2135	38.3299	46.2677	Unknown Patients	Convalescent Vaccinated
65	-7.50928	-10.7896	35.0781	32.6962	12.7972	41.6731	Unknown Patients	Convalescent Vaccinated
66	11.0856	9.73444	23.0237	8.38969	17.6746	19.1706	Unknown Patients	Convalescent Vaccinated
67	12.9903	4.09916	28.7533	23.9726	17.6493	40.8792	Unknown Patients	Convalescent Vaccinated
68	8.36671	14.7186	33.7835	24.2962	19.4047	31.5797	Unknown Patients	Convalescent Vaccinated
69	-11.9012	-2.88812	32.5438	27.8328	21.0106	42.0089	Unknown Patients	Convalescent Vaccinated
70	12.2411	6.8602	30.016	24.8613	12.2516	20.1918	Unknown Patients	Convalescent Vaccinated
71	-6.94421	-0.952103	21.8865	14.9006	8.8654	23.7774	Unknown Patients	Convalescent Vaccinated
72	-3.07735	-3.50324	47.7305	41.1672	31.8838	49.0799	Unknown Patients	Convalescent Vaccinated
73	21.3025	17.1184	35.6938	29.7733	19.3473	35.4417	Unknown Patients	Convalescent Vaccinated
74	-1.78738	-3.11774	30.9708	25.4955	10.1453	34.1272	Unknown Patients	Convalescent Vaccinated
75	1.96702	-2.8973	23.583	19.1344	6.42686	27.0184	Unknown Patients	Convalescent Vaccinated
76	-1.10626	7.04193	26.4643	24.456	9.59869	32.5735	Unknown Patients	Convalescent Vaccinated
77	-6.34003	-6.56982	45.0901	44.6673	22.0392	55.4843	Unknown Patients	Convalescent Vaccinated
78	-5.72642	-2.8563	38.8906	30.4698	25.5259	42.946	Unknown Patients	Convalescent Vaccinated
79	1.54202	-1.67729	27.5413	15.5246	11.3595	32.3137	Unknown Patients	Convalescent Vaccinated
80	8.91815	7.27892	36.1795	20.1823	16.1229	36.9981	Unknown Patients	Convalescent Vaccinated
81	2.31891	0.886348	47.9106	38.3187	13.6832	49.0224	Unknown Patients	Convalescent Vaccinated
82	6.68788	9.6074	34.0589	24.4353	17.4124	36.0821	Unknown Patients	Convalescent Vaccinated
83	-6.57968	-2.68797	25.5545	16.8383	12.5794	29.6236	Unknown Patients	Convalescent Vaccinated
84	5.65556	0.76836	17.8053	12.037	-6.89049	24.436	Unknown Patients	Convalescent Vaccinated
85	-3.19259	-0.881023	30.66	25.9408	33.3813	37.1912	Unknown Patients	Convalescent Vaccinated
86	-4.78525	-3.34776	24.0717	18.4185	10.6542	26.544	Unknown Patients	Convalescent Vaccinated
87	3.68462	8.11968	25.7924	19.3992	15.9086	32.0997	Unknown Patients	Convalescent Vaccinated
88	-4.47813	2.23961	31.5921	22.433	30.5303	42.0462	Unknown Patients	Convalescent Vaccinated
89	0.616036	2.15722	19.047	12.6491	17.6772	25.2477	Unknown Patients	Convalescent Vaccinated
90	-7.61245	-11.032	36.2307	31.4693	37.7221	43.4674	Unknown Patients	Convalescent Vaccinated
91	-0.51409	-7.45844	41.6519	33.7681	16.6317	43.4497	Unknown Patients	Convalescent Vaccinated
92	-1.67312	-6.44237	43.5101	37.3502	11.2665	44.6063	Unknown Patients	Convalescent Vaccinated
93	3.79672	0.649453	28.9741	22.023	21.8016	28.9319	Unknown Patients	Convalescent Vaccinated
94	22.2826	10.7606	39.8324	30.3645	27.3668	41.7931	Unknown Patients	Convalescent Vaccinated
95	11.212	4.11765	16.8763	3.13286	7.19022	17.8982	Unknown Patients	Convalescent Vaccinated
96	10.086	7.03301	28.5918	21.4938	16.3836	28.0859	Unknown Patients	Convalescent Vaccinated
97	0.337562	-13.212	36.2057	28.1983	18.1272	34.4215	Unknown Patients	Convalescent Vaccinated
98	-6.89283	-8.95112	53.1006	41.7223	16.4631	56.9584	Unknown Patients	Convalescent Vaccinated
99	6.64673	-4.1705	44.3568	37.4884	26.8558	50.239	Unknown Patients	Convalescent Vaccinated
100	1.66961	-9.82858	42.0731	35.6341	13.9995	38.5227	Unknown Patients	Convalescent Vaccinated
