# Supplementary material for: Machine-learning-aided multiplexed nanoplasmonic biosensor for COVID-19 population immunity profiling
Source: Royal Society of Chemistry journal article supplement (doi:10.1039/d3sd00081h), 2023-01-01
Supplement: d3sd00081h2.pdf [file d3sd00081h2.pdf]

## Supplementary Information

### Machine-learning-aided Multiplexed Nanoplasmonic Biosensor for COVID-19 Population Immunity Profiling

Aidana Beisenova<sup>a,†</sup>, Wihan Adi<sup>a,†</sup>, S. Janna Bashar<sup>b</sup>, Monniesh Velmurugan<sup>c,d</sup>, Kenzie B. Germanson<sup>a</sup>, Miriam A. Shelef<sup>b,c</sup>, Filiz Yesilkoy<sup>a,\*</sup>

<sup>a</sup>Department of Biomedical Engineering, University of Wisconsin-Madison, Madison, WI 53706, USA

<sup>b</sup>Department of Medicine, University of Wisconsin-Madison, Madison, WI 53705, USA

<sup>c</sup>Department of Computer Science, University of Wisconsin-Madison, Madison, WI 53706, USA

<sup>d</sup>Department of Statistics, University of Wisconsin-Madison, Madison, WI 53706, USA

<sup>e</sup>William S. Middleton Memorial Veterans Hospital, Madison, WI 53705, USA

†These authors contributed equally to this work

\*Corresponding author. Email: [filiz.yesilkoy@wisc.edu](mailto:filiz.yesilkoy@wisc.edu)

|                                                                                                                                                              |     |
|--------------------------------------------------------------------------------------------------------------------------------------------------------------|-----|
| <b>S1:</b> Distribution of infection rate, vaccination rate, and omicron share predicted by ML-aided nanobiosensor to identify the 95% confidence intervals. | 2-3 |
|--------------------------------------------------------------------------------------------------------------------------------------------------------------|-----|

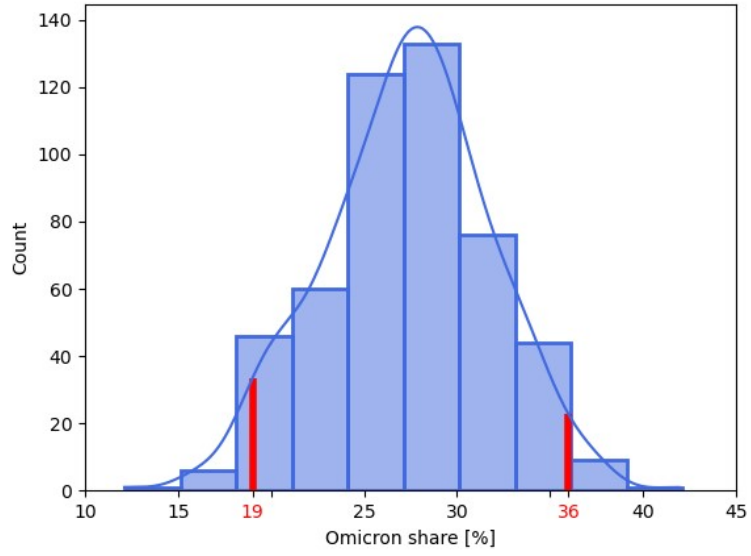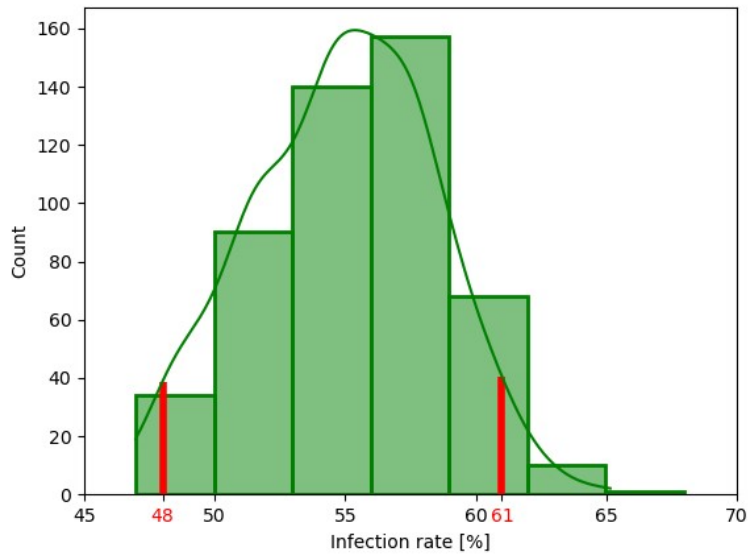

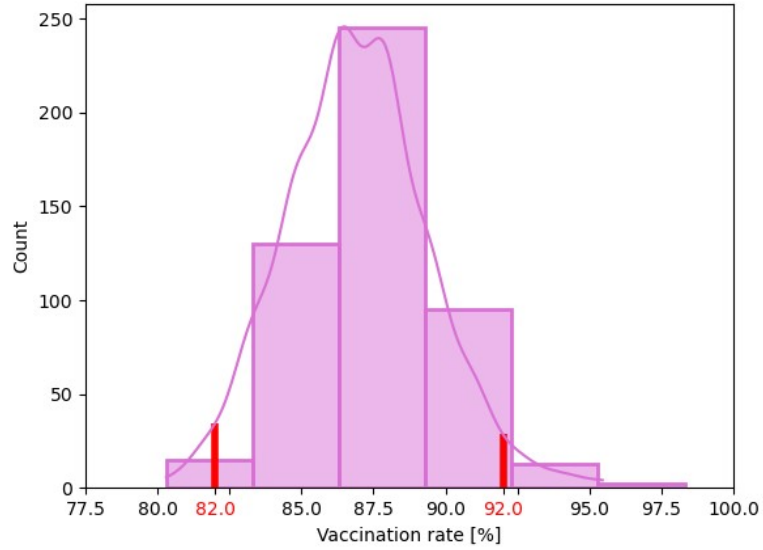

**S1.** Distribution of omicron share, infection rate, and vaccination rate predicted by the random forest classification model. The red vertical lines indicate upper and lower bounds of the 95% confidence intervals.
